# Supplementary material
Source: PubMed Central journal article supplement (PMC3306459)
Supplement: NIHMS340698-supplement-01.pdf [file NIHMS340698-supplement-01.pdf]

## **Arg375 Tunes Tetrahydrobiopterin Functions and Modulates Catalysis by Inducible Nitric Oxide Synthase**

Zhi-Qiang Wang<sup>1\*</sup>, Jesús Tejero<sup>2</sup>, Chin-Chuan Wei<sup>3</sup>, Mohammad Mahfuzul Haque<sup>2</sup>, Jerome Santolini<sup>4</sup>, Mohammed Fadlalla<sup>2</sup>, Ashis Biswas<sup>2</sup> and Dennis J. Stuehr<sup>2\*</sup>

<sup>1</sup>Department of Chemistry and Biochemistry, Kent State University at Tuscarawas, New Philadelphia, Ohio, 44663

<sup>2</sup>Department of Pathobiology, Lerner Research Institute, Cleveland Clinic Foundation, Cleveland, Ohio, 44195

<sup>3</sup>Department of Chemistry, Southern Illinois University Edwardsville, Edwardsville, IL, 62026

<sup>4</sup>iBiTec-S; LSOD, C. E. A. Saclay; 91191 Gif-sur-Yvette Cedex, France

Running title: Catalytic activities of Arg375 mutants of iNOSoxy

\*Corresponding authors: Z.-Q. Wang, Phone 1-330-308-7564; Fax: 1-330-339-5022; E-mail: zwang3@kent.edu; D.J. Stuehr, Phone 1-216-445-6950; Fax: 1-216-636-0104; E-mail: stuehrd@ccf.org;

Fig. S1

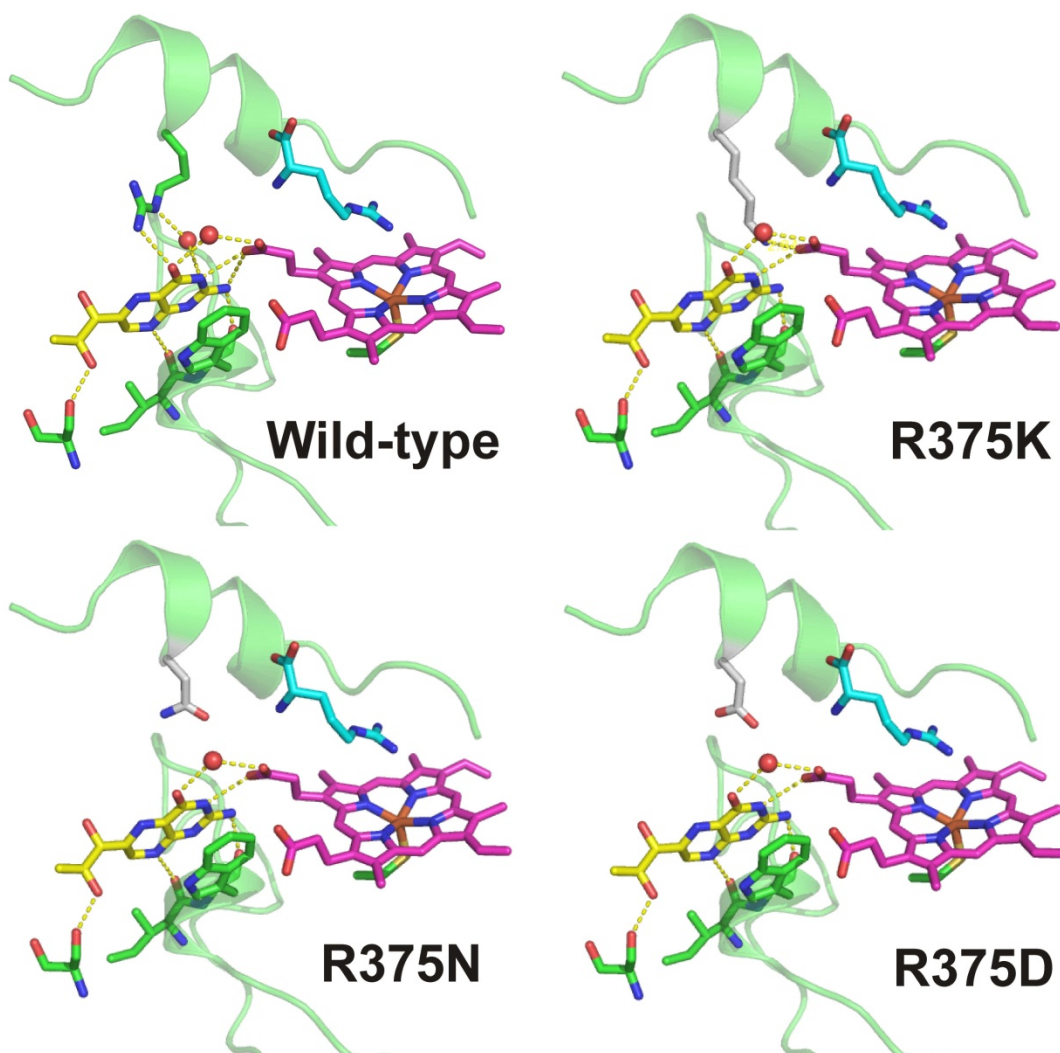

**Fig. S1. Models for the H<sub>4</sub>B environment in Arg375 mutants.** Top left, wild-type structure; Top right, R375K mutant; bottom left, R375N, bottom right, R375D. Mutant structures indicate a possible orientation of the mutated side chain (white) in the absence of major structural changes relative to the wild-type structure. Only the side chain of R375K is long enough to establish direct interactions with the H<sub>4</sub>B cofactor. Relevant iNOS residues are shown in green; H<sub>4</sub>B (yellow), heme (pink) and the substrate L-Arg (blue) are shown as sticks. Two water molecules that mediate H-bonding interactions are shown as red spheres. The hydrogen bonding interactions are shown as yellow dashes. The figure was made using PyMOL (<http://www.pymol.org/>) with the crystal structure of the mouse iNOSoxy dimer (PDB entry 1NOD [12;79]).
